# Supplementary material
Source: publisher site journal article supplement (https://www.spandidos-publications.com/4547/downloadSupplementary)
Supplement: Supplementary file 1 [file downloadSupplementary]

## Sheet: Sheet1
Table SVI. Interactions of all mutated genes.
A, Interactions of all mutated genes in BM group (n=26)											B, Interactions of all mutated genes in Non-BM group (n=64)
gene1	gene2	pValue	oddsRatio	0	11	1	10	Event	pair		gene1	gene2	pValue	oddsRatio	0	11	1	10	Event	pair
VHL	ALK	0.0434783	Inf	22	1	0	0	Co_Occurence	ALK, VHL		FGFR3	CD3EAP	0.0141414	Inf	48	2	5	0	Co_Occurence	CD3EAP, FGFR3
SOD2	KRAS	0.0434783	Inf	22	1	0	0	Co_Occurence	KRAS, SOD2		IDH1	BRAF	0.0181818	Inf	54	1	0	0	Co_Occurence	BRAF, IDH1
TERT	KRAS	0.0434783	Inf	22	1	0	0	Co_Occurence	KRAS, TERT		EGFR	KRAS	0.0183261	0	26	0	8	21	Mutually_Exclusive	EGFR, KRAS
TERT	SOD2	0.0434783	Inf	22	1	0	0	Co_Occurence	SOD2, TERT		NTRK1	KRAS	0.0188552	Inf	47	2	6	0	Co_Occurence	KRAS, NTRK1
APC	CYP2D6	0.0869565	Inf	21	1	1	0	Co_Occurence	APC, CYP2D6		PIK3CA	KRAS	0.0340249	8.23072	44	3	5	3	Co_Occurence	KRAS, PIK3CA
ALK	DPYD	0.0869565	Inf	21	1	1	0	Co_Occurence	ALK, DPYD		CDKN2A	BRAF	0.0363636	Inf	53	1	0	1	Co_Occurence	BRAF, CDKN2A
VHL	DPYD	0.0869565	Inf	21	1	1	0	Co_Occurence	DPYD, VHL		FGFR3	BRAF	0.0363636	Inf	53	1	0	1	Co_Occurence	BRAF, FGFR3
ALK	TPMT	0.0869565	Inf	21	1	1	0	Co_Occurence	ALK, TPMT		CDKN2A	IDH1	0.0363636	Inf	53	1	0	1	Co_Occurence	CDKN2A, IDH1
VHL	TPMT	0.0869565	Inf	21	1	1	0	Co_Occurence	TPMT, VHL		FGFR3	IDH1	0.0363636	Inf	53	1	0	1	Co_Occurence	FGFR3, IDH1
CD3EAP	EGFR	0.127273	0	10	0	9	4	Mutually_Exclusive	CD3EAP, EGFR		PDGFRA	JAK2	0.0363636	Inf	53	1	0	1	Co_Occurence	JAK2, PDGFRA
EGFR	CYP2D6	0.142292	Inf	14	2	0	7	Co_Occurence	CYP2D6, EGFR		CDKN2A	KIT	0.0363636	Inf	53	1	0	1	Co_Occurence	CDKN2A, KIT
TPMT	DPYD	0.16996	14.4912	20	1	1	1	Co_Occurence	DPYD, TPMT		HRAS	CD3EAP	0.0397561	16.859	47	2	5	1	Co_Occurence	CD3EAP, HRAS
RB1	CD3EAP	0.173913	Inf	19	1	3	0	Co_Occurence	CD3EAP, RB1		TP53	CYP2D6	0.0587002	0	19	0	3	33	Mutually_Exclusive	CYP2D6, TP53
CDA	CTNNB1	0.173913	Inf	19	1	3	0	Co_Occurence	CDA, CTNNB1		FGFR3	CDKN2A	0.0720539	37.1132	52	1	1	1	Co_Occurence	CDKN2A, FGFR3
DPYD	TP53	0.217391	0	9	0	12	2	Mutually_Exclusive	DPYD, TP53		NTRK1	FGFR3	0.0720539	37.1132	52	1	1	1	Co_Occurence	FGFR3, NTRK1
TPMT	TP53	0.217391	0	9	0	12	2	Mutually_Exclusive	TP53, TPMT		NRAS	APC	0.0727273	Inf	51	1	3	0	Co_Occurence	APC, NRAS
CTNNB1	EGFR	0.260079	5.95077	13	3	6	1	Co_Occurence	CTNNB1, EGFR		HRAS	ATM	0.107071	21.0239	51	1	1	2	Co_Occurence	ATM, HRAS
TP53	CD3EAP	0.31677	0.25755	8	1	3	11	Mutually_Exclusive	CD3EAP, TP53		DPYD	FGFR3	0.107071	21.0239	51	1	1	2	Co_Occurence	DPYD, FGFR3
TP53	CTNNB1	0.31677	0.25755	8	1	3	11	Mutually_Exclusive	CTNNB1, TP53		DPYD	NTRK1	0.107071	21.0239	51	1	1	2	Co_Occurence	DPYD, NTRK1
CTNNB1	DPYD	0.324111	5.33862	18	1	1	3	Co_Occurence	CTNNB1, DPYD		PIK3CA	FBXW7	0.109091	Inf	49	1	0	5	Co_Occurence	FBXW7, PIK3CA
EGFR	APC	0.391304	Inf	14	1	0	8	Co_Occurence	APC, EGFR		PIK3CA	KIT	0.109091	Inf	49	1	0	5	Co_Occurence	KIT, PIK3CA
EGFR	CDA	0.391304	Inf	14	1	0	8	Co_Occurence	CDA, EGFR		BRAF	CD3EAP	0.127273	Inf	48	1	6	0	Co_Occurence	BRAF, CD3EAP
TP53	EGFR	0.400323	2.55234	8	6	3	6	Co_Occurence	EGFR, TP53		IDH1	CD3EAP	0.127273	Inf	48	1	6	0	Co_Occurence	CD3EAP, IDH1
ALK	TP53	0.478261	0	10	0	12	1	Mutually_Exclusive	ALK, TP53		FBXW7	RB1	0.127273	Inf	48	1	6	0	Co_Occurence	FBXW7, RB1
CDA	TP53	0.478261	0	10	0	12	1	Mutually_Exclusive	CDA, TP53		KIT	RB1	0.127273	Inf	48	1	6	0	Co_Occurence	KIT, RB1
NRAS	TP53	0.478261	0	10	0	12	1	Mutually_Exclusive	NRAS, TP53		ERBB4	EGFR	0.141414	Inf	34	2	19	0	Co_Occurence	EGFR, ERBB4
SMAD4	TP53	0.478261	0	10	0	12	1	Mutually_Exclusive	SMAD4, TP53		APC	TP53	0.141429	Inf	22	4	29	0	Co_Occurence	APC, TP53
VHL	TP53	0.478261	0	10	0	12	1	Mutually_Exclusive	TP53, VHL		FBXW7	KRAS	0.145455	Inf	47	1	7	0	Co_Occurence	FBXW7, KRAS
TP53	CYP2D6	0.478261	Inf	11	2	0	10	Co_Occurence	CYP2D6, TP53		FGFR3	TP53	0.155556	0	20	0	33	2	Mutually_Exclusive	FGFR3, TP53
TPMT	EGFR	0.501976	0	12	0	9	2	Mutually_Exclusive	EGFR, TPMT		NTRK1	TP53	0.155556	0	20	0	33	2	Mutually_Exclusive	NTRK1, TP53
DPYD	EGFR	0.999	1.58984	13	1	8	1	Co_Occurence	DPYD, EGFR		PIK3CA	RB1	0.163232	4.22794	44	2	5	4	Co_Occurence	PIK3CA, RB1
CTNNB1	CD3EAP	0.999	0	15	0	4	4	Mutually_Exclusive	CD3EAP, CTNNB1		CDKN2A	PIK3CA	0.208081	8.85505	48	1	5	1	Co_Occurence	CDKN2A, PIK3CA
APC	TP53	0.999	Inf	11	1	11	0	Co_Occurence	APC, TP53		NTRK1	PIK3CA	0.208081	8.85505	48	1	5	1	Co_Occurence	NTRK1, PIK3CA
KRAS	TP53	0.999	Inf	11	1	11	0	Co_Occurence	KRAS, TP53		OBSCN	PIK3CA	0.208081	8.85505	48	1	5	1	Co_Occurence	OBSCN, PIK3CA
RB1	TP53	0.999	Inf	11	1	11	0	Co_Occurence	RB1, TP53		RB1	ATM	0.240404	7.32983	47	1	1	6	Co_Occurence	ATM, RB1
SOD2	TP53	0.999	Inf	11	1	11	0	Co_Occurence	SOD2, TP53		CD3EAP	CDKN2A	0.240404	7.32983	47	1	1	6	Co_Occurence	CD3EAP, CDKN2A
TERT	TP53	0.999	Inf	11	1	11	0	Co_Occurence	TERT, TP53		RB1	CDKN2A	0.240404	7.32983	47	1	1	6	Co_Occurence	CDKN2A, RB1
ALK	EGFR	0.999	0	13	0	9	1	Mutually_Exclusive	ALK, EGFR		CD3EAP	NTRK1	0.240404	7.32983	47	1	1	6	Co_Occurence	CD3EAP, NTRK1
KRAS	EGFR	0.999	0	13	0	9	1	Mutually_Exclusive	EGFR, KRAS		KRAS	ATM	0.272054	6.21347	46	1	1	7	Co_Occurence	ATM, KRAS
NRAS	EGFR	0.999	0	13	0	9	1	Mutually_Exclusive	EGFR, NRAS		KRAS	FGFR3	0.272054	6.21347	46	1	1	7	Co_Occurence	FGFR3, KRAS
RB1	EGFR	0.999	0	13	0	9	1	Mutually_Exclusive	EGFR, RB1		APC	EGFR	0.286115	0	30	0	21	4	Mutually_Exclusive	APC, EGFR
SMAD4	EGFR	0.999	0	13	0	9	1	Mutually_Exclusive	EGFR, SMAD4		DPYD	CD3EAP	0.340728	3.69539	46	1	6	2	Co_Occurence	CD3EAP, DPYD
SOD2	EGFR	0.999	0	13	0	9	1	Mutually_Exclusive	EGFR, SOD2		CYP2D6	RB1	0.340728	3.69539	46	1	6	2	Co_Occurence	CYP2D6, RB1
TERT	EGFR	0.999	0	13	0	9	1	Mutually_Exclusive	EGFR, TERT		DPYD	RB1	0.340728	3.69539	46	1	6	2	Co_Occurence	DPYD, RB1
VHL	EGFR	0.999	0	13	0	9	1	Mutually_Exclusive	EGFR, VHL		HRAS	RB1	0.340728	3.69539	46	1	6	2	Co_Occurence	HRAS, RB1
CYP2D6	CD3EAP	0.999	0	17	0	4	2	Mutually_Exclusive	CD3EAP, CYP2D6		APC	PIK3CA	0.378763	2.97876	46	1	5	3	Co_Occurence	APC, PIK3CA
DPYD	CD3EAP	0.999	0	17	0	4	2	Mutually_Exclusive	CD3EAP, DPYD		EGFR	JAK2	0.381818	Inf	34	1	0	20	Co_Occurence	EGFR, JAK2
TPMT	CD3EAP	0.999	0	17	0	4	2	Mutually_Exclusive	CD3EAP, TPMT		EGFR	KIT	0.381818	Inf	34	1	0	20	Co_Occurence	EGFR, KIT
ALK	CD3EAP	0.999	0	18	0	4	1	Mutually_Exclusive	ALK, CD3EAP		EGFR	MTOR	0.381818	Inf	34	1	0	20	Co_Occurence	EGFR, MTOR
APC	CD3EAP	0.999	0	18	0	4	1	Mutually_Exclusive	APC, CD3EAP		EGFR	TERT	0.381818	Inf	34	1	0	20	Co_Occurence	EGFR, TERT
CDA	CD3EAP	0.999	0	18	0	4	1	Mutually_Exclusive	CD3EAP, CDA		EGFR	TPMT	0.381818	Inf	34	1	0	20	Co_Occurence	EGFR, TPMT
KRAS	CD3EAP	0.999	0	18	0	4	1	Mutually_Exclusive	CD3EAP, KRAS		KRAS	DPYD	0.381933	3.12026	45	1	2	7	Co_Occurence	DPYD, KRAS
NRAS	CD3EAP	0.999	0	18	0	4	1	Mutually_Exclusive	CD3EAP, NRAS		PIK3CA	TP53	0.384099	3.67451	21	5	28	1	Co_Occurence	PIK3CA, TP53
SMAD4	CD3EAP	0.999	0	18	0	4	1	Mutually_Exclusive	CD3EAP, SMAD4		BRAF	TP53	0.4	0	21	0	33	1	Mutually_Exclusive	BRAF, TP53
SOD2	CD3EAP	0.999	0	18	0	4	1	Mutually_Exclusive	CD3EAP, SOD2		IDH1	TP53	0.4	0	21	0	33	1	Mutually_Exclusive	IDH1, TP53
TERT	CD3EAP	0.999	0	18	0	4	1	Mutually_Exclusive	CD3EAP, TERT		MTOR	TP53	0.4	0	21	0	33	1	Mutually_Exclusive	MTOR, TP53
VHL	CD3EAP	0.999	0	18	0	4	1	Mutually_Exclusive	CD3EAP, VHL		SRC	TP53	0.4	0	21	0	33	1	Mutually_Exclusive	SRC, TP53
CYP2D6	CTNNB1	0.999	0	17	0	4	2	Mutually_Exclusive	CTNNB1, CYP2D6		TERT	TP53	0.4	0	21	0	33	1	Mutually_Exclusive	TERT, TP53
TPMT	CTNNB1	0.999	0	17	0	4	2	Mutually_Exclusive	CTNNB1, TPMT		EGFR	TP53	0.406676	0.6057	12	11	22	10	Mutually_Exclusive	EGFR, TP53
ALK	CTNNB1	0.999	0	18	0	4	1	Mutually_Exclusive	ALK, CTNNB1		TP53	CD3EAP	0.419294	0.456861	18	3	4	30	Mutually_Exclusive	CD3EAP, TP53
APC	CTNNB1	0.999	0	18	0	4	1	Mutually_Exclusive	APC, CTNNB1		KRAS	APC	0.47702	2.06063	44	1	3	7	Co_Occurence	APC, KRAS
KRAS	CTNNB1	0.999	0	18	0	4	1	Mutually_Exclusive	CTNNB1, KRAS		TP53	OBSCN	0.511111	Inf	22	2	0	31	Co_Occurence	OBSCN, TP53
NRAS	CTNNB1	0.999	0	18	0	4	1	Mutually_Exclusive	CTNNB1, NRAS		ATM	EGFR	0.519192	0	32	0	21	2	Mutually_Exclusive	ATM, EGFR
RB1	CTNNB1	0.999	0	18	0	4	1	Mutually_Exclusive	CTNNB1, RB1		CTNNB1	EGFR	0.519192	0	32	0	21	2	Mutually_Exclusive	CTNNB1, EGFR
SMAD4	CTNNB1	0.999	0	18	0	4	1	Mutually_Exclusive	CTNNB1, SMAD4		FGFR3	EGFR	0.519192	0	32	0	21	2	Mutually_Exclusive	EGFR, FGFR3
SOD2	CTNNB1	0.999	0	18	0	4	1	Mutually_Exclusive	CTNNB1, SOD2		NTRK1	EGFR	0.519192	0	32	0	21	2	Mutually_Exclusive	EGFR, NTRK1
TERT	CTNNB1	0.999	0	18	0	4	1	Mutually_Exclusive	CTNNB1, TERT		OBSCN	EGFR	0.519192	0	32	0	21	2	Mutually_Exclusive	EGFR, OBSCN
VHL	CTNNB1	0.999	0	18	0	4	1	Mutually_Exclusive	CTNNB1, VHL		CYP2D6	EGFR	0.550943	3.39267	33	2	19	1	Co_Occurence	CYP2D6, EGFR
DPYD	CYP2D6	0.999	0	19	0	2	2	Mutually_Exclusive	CYP2D6, DPYD		HRAS	EGFR	0.550943	3.39267	33	2	19	1	Co_Occurence	EGFR, HRAS
TPMT	CYP2D6	0.999	0	19	0	2	2	Mutually_Exclusive	CYP2D6, TPMT		TP53	DPYD	0.557233	0.319346	20	1	2	32	Mutually_Exclusive	DPYD, TP53
ALK	CYP2D6	0.999	0	20	0	2	1	Mutually_Exclusive	ALK, CYP2D6		TP53	HRAS	0.557233	0.319346	20	1	2	32	Mutually_Exclusive	HRAS, TP53
CDA	CYP2D6	0.999	0	20	0	2	1	Mutually_Exclusive	CDA, CYP2D6		RB1	CD3EAP	0.576694	0	41	0	7	7	Mutually_Exclusive	CD3EAP, RB1
KRAS	CYP2D6	0.999	0	20	0	2	1	Mutually_Exclusive	CYP2D6, KRAS		RB1	EGFR	0.696049	0.615751	29	2	19	5	Mutually_Exclusive	EGFR, RB1
NRAS	CYP2D6	0.999	0	20	0	2	1	Mutually_Exclusive	CYP2D6, NRAS		TP53	KRAS	0.699813	0.62628	18	4	4	29	Mutually_Exclusive	KRAS, TP53
RB1	CYP2D6	0.999	0	20	0	2	1	Mutually_Exclusive	CYP2D6, RB1		CD3EAP	EGFR	0.999	1.24483	30	3	18	4	Co_Occurence	CD3EAP, EGFR
SMAD4	CYP2D6	0.999	0	20	0	2	1	Mutually_Exclusive	CYP2D6, SMAD4		CDKN2A	EGFR	0.999	1.63439	33	1	20	1	Co_Occurence	CDKN2A, EGFR
SOD2	CYP2D6	0.999	0	20	0	2	1	Mutually_Exclusive	CYP2D6, SOD2		PDGFRA	EGFR	0.999	1.63439	33	1	20	1	Co_Occurence	EGFR, PDGFRA
TERT	CYP2D6	0.999	0	20	0	2	1	Mutually_Exclusive	CYP2D6, TERT		KRAS	CD3EAP	0.999	0.97661	41	1	6	7	Mutually_Exclusive	CD3EAP, KRAS
VHL	CYP2D6	0.999	0	20	0	2	1	Mutually_Exclusive	CYP2D6, VHL		ATM	CD3EAP	0.999	0	46	0	7	2	Mutually_Exclusive	ATM, CD3EAP
APC	DPYD	0.999	0	20	0	2	1	Mutually_Exclusive	APC, DPYD		CTNNB1	CD3EAP	0.999	0	46	0	7	2	Mutually_Exclusive	CD3EAP, CTNNB1
CDA	DPYD	0.999	0	20	0	2	1	Mutually_Exclusive	CDA, DPYD		ERBB4	CD3EAP	0.999	0	46	0	7	2	Mutually_Exclusive	CD3EAP, ERBB4
KRAS	DPYD	0.999	0	20	0	2	1	Mutually_Exclusive	DPYD, KRAS		OBSCN	CD3EAP	0.999	0	46	0	7	2	Mutually_Exclusive	CD3EAP, OBSCN
NRAS	DPYD	0.999	0	20	0	2	1	Mutually_Exclusive	DPYD, NRAS		PDGFRA	CD3EAP	0.999	0	46	0	7	2	Mutually_Exclusive	CD3EAP, PDGFRA
RB1	DPYD	0.999	0	20	0	2	1	Mutually_Exclusive	DPYD, RB1		KRAS	RB1	0.999	0.97661	41	1	6	7	Mutually_Exclusive	KRAS, RB1
SMAD4	DPYD	0.999	0	20	0	2	1	Mutually_Exclusive	DPYD, SMAD4		CTNNB1	RB1	0.999	0	46	0	7	2	Mutually_Exclusive	CTNNB1, RB1
SOD2	DPYD	0.999	0	20	0	2	1	Mutually_Exclusive	DPYD, SOD2		ERBB4	RB1	0.999	0	46	0	7	2	Mutually_Exclusive	ERBB4, RB1
TERT	DPYD	0.999	0	20	0	2	1	Mutually_Exclusive	DPYD, TERT		FGFR3	RB1	0.999	0	46	0	7	2	Mutually_Exclusive	FGFR3, RB1
APC	TPMT	0.999	0	20	0	2	1	Mutually_Exclusive	APC, TPMT		NTRK1	RB1	0.999	0	46	0	7	2	Mutually_Exclusive	NTRK1, RB1
CDA	TPMT	0.999	0	20	0	2	1	Mutually_Exclusive	CDA, TPMT		OBSCN	RB1	0.999	0	46	0	7	2	Mutually_Exclusive	OBSCN, RB1
KRAS	TPMT	0.999	0	20	0	2	1	Mutually_Exclusive	KRAS, TPMT		PDGFRA	RB1	0.999	0	46	0	7	2	Mutually_Exclusive	PDGFRA, RB1
NRAS	TPMT	0.999	0	20	0	2	1	Mutually_Exclusive	NRAS, TPMT		ATM	PIK3CA	0.999	0	47	0	6	2	Mutually_Exclusive	ATM, PIK3CA
RB1	TPMT	0.999	0	20	0	2	1	Mutually_Exclusive	RB1, TPMT		CTNNB1	PIK3CA	0.999	0	47	0	6	2	Mutually_Exclusive	CTNNB1, PIK3CA
SMAD4	TPMT	0.999	0	20	0	2	1	Mutually_Exclusive	SMAD4, TPMT		ERBB4	PIK3CA	0.999	0	47	0	6	2	Mutually_Exclusive	ERBB4, PIK3CA
SOD2	TPMT	0.999	0	20	0	2	1	Mutually_Exclusive	SOD2, TPMT		FGFR3	PIK3CA	0.999	0	47	0	6	2	Mutually_Exclusive	FGFR3, PIK3CA
TERT	TPMT	0.999	0	20	0	2	1	Mutually_Exclusive	TERT, TPMT		PDGFRA	PIK3CA	0.999	0	47	0	6	2	Mutually_Exclusive	PDGFRA, PIK3CA
APC	ALK	0.999	0	21	0	1	1	Mutually_Exclusive	ALK, APC		KRAS	CYP2D6	0.999	0	44	0	3	8	Mutually_Exclusive	CYP2D6, KRAS
CDA	ALK	0.999	0	21	0	1	1	Mutually_Exclusive	ALK, CDA		ATM	CYP2D6	0.999	0	50	0	3	2	Mutually_Exclusive	ATM, CYP2D6
KRAS	ALK	0.999	0	21	0	1	1	Mutually_Exclusive	ALK, KRAS		CDKN2A	CYP2D6	0.999	0	50	0	3	2	Mutually_Exclusive	CDKN2A, CYP2D6
NRAS	ALK	0.999	0	21	0	1	1	Mutually_Exclusive	ALK, NRAS		CTNNB1	CYP2D6	0.999	0	50	0	3	2	Mutually_Exclusive	CTNNB1, CYP2D6
RB1	ALK	0.999	0	21	0	1	1	Mutually_Exclusive	ALK, RB1		ERBB4	CYP2D6	0.999	0	50	0	3	2	Mutually_Exclusive	CYP2D6, ERBB4
SMAD4	ALK	0.999	0	21	0	1	1	Mutually_Exclusive	ALK, SMAD4		FGFR3	CYP2D6	0.999	0	50	0	3	2	Mutually_Exclusive	CYP2D6, FGFR3
SOD2	ALK	0.999	0	21	0	1	1	Mutually_Exclusive	ALK, SOD2		NTRK1	CYP2D6	0.999	0	50	0	3	2	Mutually_Exclusive	CYP2D6, NTRK1
TERT	ALK	0.999	0	21	0	1	1	Mutually_Exclusive	ALK, TERT		OBSCN	CYP2D6	0.999	0	50	0	3	2	Mutually_Exclusive	CYP2D6, OBSCN
CDA	APC	0.999	0	21	0	1	1	Mutually_Exclusive	APC, CDA		PDGFRA	CYP2D6	0.999	0	50	0	3	2	Mutually_Exclusive	CYP2D6, PDGFRA
KRAS	APC	0.999	0	21	0	1	1	Mutually_Exclusive	APC, KRAS		ATM	DPYD	0.999	0	50	0	3	2	Mutually_Exclusive	ATM, DPYD
NRAS	APC	0.999	0	21	0	1	1	Mutually_Exclusive	APC, NRAS		CDKN2A	DPYD	0.999	0	50	0	3	2	Mutually_Exclusive	CDKN2A, DPYD
RB1	APC	0.999	0	21	0	1	1	Mutually_Exclusive	APC, RB1		CTNNB1	DPYD	0.999	0	50	0	3	2	Mutually_Exclusive	CTNNB1, DPYD
SMAD4	APC	0.999	0	21	0	1	1	Mutually_Exclusive	APC, SMAD4		ERBB4	DPYD	0.999	0	50	0	3	2	Mutually_Exclusive	DPYD, ERBB4
SOD2	APC	0.999	0	21	0	1	1	Mutually_Exclusive	APC, SOD2		OBSCN	DPYD	0.999	0	50	0	3	2	Mutually_Exclusive	DPYD, OBSCN
TERT	APC	0.999	0	21	0	1	1	Mutually_Exclusive	APC, TERT		PDGFRA	DPYD	0.999	0	50	0	3	2	Mutually_Exclusive	DPYD, PDGFRA
VHL	APC	0.999	0	21	0	1	1	Mutually_Exclusive	APC, VHL		KRAS	HRAS	0.999	0	44	0	3	8	Mutually_Exclusive	HRAS, KRAS
KRAS	CDA	0.999	0	21	0	1	1	Mutually_Exclusive	CDA, KRAS		CDKN2A	HRAS	0.999	0	50	0	3	2	Mutually_Exclusive	CDKN2A, HRAS
NRAS	CDA	0.999	0	21	0	1	1	Mutually_Exclusive	CDA, NRAS		CTNNB1	HRAS	0.999	0	50	0	3	2	Mutually_Exclusive	CTNNB1, HRAS
RB1	CDA	0.999	0	21	0	1	1	Mutually_Exclusive	CDA, RB1		ERBB4	HRAS	0.999	0	50	0	3	2	Mutually_Exclusive	ERBB4, HRAS
SMAD4	CDA	0.999	0	21	0	1	1	Mutually_Exclusive	CDA, SMAD4		FGFR3	HRAS	0.999	0	50	0	3	2	Mutually_Exclusive	FGFR3, HRAS
SOD2	CDA	0.999	0	21	0	1	1	Mutually_Exclusive	CDA, SOD2		NTRK1	HRAS	0.999	0	50	0	3	2	Mutually_Exclusive	HRAS, NTRK1
TERT	CDA	0.999	0	21	0	1	1	Mutually_Exclusive	CDA, TERT		OBSCN	HRAS	0.999	0	50	0	3	2	Mutually_Exclusive	HRAS, OBSCN
VHL	CDA	0.999	0	21	0	1	1	Mutually_Exclusive	CDA, VHL		PDGFRA	HRAS	0.999	0	50	0	3	2	Mutually_Exclusive	HRAS, PDGFRA
NRAS	KRAS	0.999	0	21	0	1	1	Mutually_Exclusive	KRAS, NRAS		PIK3CA	BRAF	0.999	0	48	0	1	6	Mutually_Exclusive	BRAF, PIK3CA
RB1	KRAS	0.999	0	21	0	1	1	Mutually_Exclusive	KRAS, RB1		APC	BRAF	0.999	0	50	0	1	4	Mutually_Exclusive	APC, BRAF
SMAD4	KRAS	0.999	0	21	0	1	1	Mutually_Exclusive	KRAS, SMAD4		ERBB2	BRAF	0.999	0	53	0	1	1	Mutually_Exclusive	BRAF, ERBB2
VHL	KRAS	0.999	0	21	0	1	1	Mutually_Exclusive	KRAS, VHL		FBXW7	BRAF	0.999	0	53	0	1	1	Mutually_Exclusive	BRAF, FBXW7
RB1	NRAS	0.999	0	21	0	1	1	Mutually_Exclusive	NRAS, RB1		JAK2	BRAF	0.999	0	53	0	1	1	Mutually_Exclusive	BRAF, JAK2
SMAD4	NRAS	0.999	0	21	0	1	1	Mutually_Exclusive	NRAS, SMAD4		KIT	BRAF	0.999	0	53	0	1	1	Mutually_Exclusive	BRAF, KIT
SOD2	NRAS	0.999	0	21	0	1	1	Mutually_Exclusive	NRAS, SOD2		MTOR	BRAF	0.999	0	53	0	1	1	Mutually_Exclusive	BRAF, MTOR
TERT	NRAS	0.999	0	21	0	1	1	Mutually_Exclusive	NRAS, TERT		NRAS	BRAF	0.999	0	53	0	1	1	Mutually_Exclusive	BRAF, NRAS
VHL	NRAS	0.999	0	21	0	1	1	Mutually_Exclusive	NRAS, VHL		SRC	BRAF	0.999	0	53	0	1	1	Mutually_Exclusive	BRAF, SRC
SMAD4	RB1	0.999	0	21	0	1	1	Mutually_Exclusive	RB1, SMAD4		TERT	BRAF	0.999	0	53	0	1	1	Mutually_Exclusive	BRAF, TERT
SOD2	RB1	0.999	0	21	0	1	1	Mutually_Exclusive	RB1, SOD2		TPMT	BRAF	0.999	0	53	0	1	1	Mutually_Exclusive	BRAF, TPMT
TERT	RB1	0.999	0	21	0	1	1	Mutually_Exclusive	RB1, TERT		XRCC1	BRAF	0.999	0	53	0	1	1	Mutually_Exclusive	BRAF, XRCC1
VHL	RB1	0.999	0	21	0	1	1	Mutually_Exclusive	RB1, VHL		PIK3CA	ERBB2	0.999	0	48	0	1	6	Mutually_Exclusive	ERBB2, PIK3CA
SOD2	SMAD4	0.999	0	21	0	1	1	Mutually_Exclusive	SMAD4, SOD2		APC	ERBB2	0.999	0	50	0	1	4	Mutually_Exclusive	APC, ERBB2
TERT	SMAD4	0.999	0	21	0	1	1	Mutually_Exclusive	SMAD4, TERT		FBXW7	ERBB2	0.999	0	53	0	1	1	Mutually_Exclusive	ERBB2, FBXW7
VHL	SMAD4	0.999	0	21	0	1	1	Mutually_Exclusive	SMAD4, VHL		IDH1	ERBB2	0.999	0	53	0	1	1	Mutually_Exclusive	ERBB2, IDH1
VHL	SOD2	0.999	0	21	0	1	1	Mutually_Exclusive	SOD2, VHL		JAK2	ERBB2	0.999	0	53	0	1	1	Mutually_Exclusive	ERBB2, JAK2
VHL	TERT	0.999	0	21	0	1	1	Mutually_Exclusive	TERT, VHL		KIT	ERBB2	0.999	0	53	0	1	1	Mutually_Exclusive	ERBB2, KIT
											MTOR	ERBB2	0.999	0	53	0	1	1	Mutually_Exclusive	ERBB2, MTOR
											NRAS	ERBB2	0.999	0	53	0	1	1	Mutually_Exclusive	ERBB2, NRAS
											SRC	ERBB2	0.999	0	53	0	1	1	Mutually_Exclusive	ERBB2, SRC
											TERT	ERBB2	0.999	0	53	0	1	1	Mutually_Exclusive	ERBB2, TERT
											TPMT	ERBB2	0.999	0	53	0	1	1	Mutually_Exclusive	ERBB2, TPMT
											XRCC1	ERBB2	0.999	0	53	0	1	1	Mutually_Exclusive	ERBB2, XRCC1
											APC	FBXW7	0.999	0	50	0	1	4	Mutually_Exclusive	APC, FBXW7
											IDH1	FBXW7	0.999	0	53	0	1	1	Mutually_Exclusive	FBXW7, IDH1
											JAK2	FBXW7	0.999	0	53	0	1	1	Mutually_Exclusive	FBXW7, JAK2
											KIT	FBXW7	0.999	0	53	0	1	1	Mutually_Exclusive	FBXW7, KIT
											MTOR	FBXW7	0.999	0	53	0	1	1	Mutually_Exclusive	FBXW7, MTOR
											NRAS	FBXW7	0.999	0	53	0	1	1	Mutually_Exclusive	FBXW7, NRAS
											SRC	FBXW7	0.999	0	53	0	1	1	Mutually_Exclusive	FBXW7, SRC
											TERT	FBXW7	0.999	0	53	0	1	1	Mutually_Exclusive	FBXW7, TERT
											TPMT	FBXW7	0.999	0	53	0	1	1	Mutually_Exclusive	FBXW7, TPMT
											XRCC1	FBXW7	0.999	0	53	0	1	1	Mutually_Exclusive	FBXW7, XRCC1
											PIK3CA	IDH1	0.999	0	48	0	1	6	Mutually_Exclusive	IDH1, PIK3CA
											APC	IDH1	0.999	0	50	0	1	4	Mutually_Exclusive	APC, IDH1
											JAK2	IDH1	0.999	0	53	0	1	1	Mutually_Exclusive	IDH1, JAK2
											KIT	IDH1	0.999	0	53	0	1	1	Mutually_Exclusive	IDH1, KIT
											MTOR	IDH1	0.999	0	53	0	1	1	Mutually_Exclusive	IDH1, MTOR
											NRAS	IDH1	0.999	0	53	0	1	1	Mutually_Exclusive	IDH1, NRAS
											SRC	IDH1	0.999	0	53	0	1	1	Mutually_Exclusive	IDH1, SRC
											TERT	IDH1	0.999	0	53	0	1	1	Mutually_Exclusive	IDH1, TERT
											TPMT	IDH1	0.999	0	53	0	1	1	Mutually_Exclusive	IDH1, TPMT
											XRCC1	IDH1	0.999	0	53	0	1	1	Mutually_Exclusive	IDH1, XRCC1
											PIK3CA	JAK2	0.999	0	48	0	1	6	Mutually_Exclusive	JAK2, PIK3CA
											APC	JAK2	0.999	0	50	0	1	4	Mutually_Exclusive	APC, JAK2
											KIT	JAK2	0.999	0	53	0	1	1	Mutually_Exclusive	JAK2, KIT
											MTOR	JAK2	0.999	0	53	0	1	1	Mutually_Exclusive	JAK2, MTOR
											NRAS	JAK2	0.999	0	53	0	1	1	Mutually_Exclusive	JAK2, NRAS
											SRC	JAK2	0.999	0	53	0	1	1	Mutually_Exclusive	JAK2, SRC
											TERT	JAK2	0.999	0	53	0	1	1	Mutually_Exclusive	JAK2, TERT
											TPMT	JAK2	0.999	0	53	0	1	1	Mutually_Exclusive	JAK2, TPMT
											XRCC1	JAK2	0.999	0	53	0	1	1	Mutually_Exclusive	JAK2, XRCC1
											APC	KIT	0.999	0	50	0	1	4	Mutually_Exclusive	APC, KIT
											MTOR	KIT	0.999	0	53	0	1	1	Mutually_Exclusive	KIT, MTOR
											NRAS	KIT	0.999	0	53	0	1	1	Mutually_Exclusive	KIT, NRAS
											SRC	KIT	0.999	0	53	0	1	1	Mutually_Exclusive	KIT, SRC
											TERT	KIT	0.999	0	53	0	1	1	Mutually_Exclusive	KIT, TERT
											TPMT	KIT	0.999	0	53	0	1	1	Mutually_Exclusive	KIT, TPMT
											XRCC1	KIT	0.999	0	53	0	1	1	Mutually_Exclusive	KIT, XRCC1
											PIK3CA	MTOR	0.999	0	48	0	1	6	Mutually_Exclusive	MTOR, PIK3CA
											APC	MTOR	0.999	0	50	0	1	4	Mutually_Exclusive	APC, MTOR
											NRAS	MTOR	0.999	0	53	0	1	1	Mutually_Exclusive	MTOR, NRAS
											SRC	MTOR	0.999	0	53	0	1	1	Mutually_Exclusive	MTOR, SRC
											TERT	MTOR	0.999	0	53	0	1	1	Mutually_Exclusive	MTOR, TERT
											TPMT	MTOR	0.999	0	53	0	1	1	Mutually_Exclusive	MTOR, TPMT
											XRCC1	MTOR	0.999	0	53	0	1	1	Mutually_Exclusive	MTOR, XRCC1
											PIK3CA	NRAS	0.999	0	48	0	1	6	Mutually_Exclusive	NRAS, PIK3CA
											SRC	NRAS	0.999	0	53	0	1	1	Mutually_Exclusive	NRAS, SRC
											TERT	NRAS	0.999	0	53	0	1	1	Mutually_Exclusive	NRAS, TERT
											TPMT	NRAS	0.999	0	53	0	1	1	Mutually_Exclusive	NRAS, TPMT
											XRCC1	NRAS	0.999	0	53	0	1	1	Mutually_Exclusive	NRAS, XRCC1
											PIK3CA	SRC	0.999	0	48	0	1	6	Mutually_Exclusive	PIK3CA, SRC
											APC	SRC	0.999	0	50	0	1	4	Mutually_Exclusive	APC, SRC
											TERT	SRC	0.999	0	53	0	1	1	Mutually_Exclusive	SRC, TERT
											TPMT	SRC	0.999	0	53	0	1	1	Mutually_Exclusive	SRC, TPMT
											XRCC1	SRC	0.999	0	53	0	1	1	Mutually_Exclusive	SRC, XRCC1
											PIK3CA	TERT	0.999	0	48	0	1	6	Mutually_Exclusive	PIK3CA, TERT
											APC	TERT	0.999	0	50	0	1	4	Mutually_Exclusive	APC, TERT
											TPMT	TERT	0.999	0	53	0	1	1	Mutually_Exclusive	TERT, TPMT
											XRCC1	TERT	0.999	0	53	0	1	1	Mutually_Exclusive	TERT, XRCC1
											PIK3CA	TPMT	0.999	0	48	0	1	6	Mutually_Exclusive	PIK3CA, TPMT
											APC	TPMT	0.999	0	50	0	1	4	Mutually_Exclusive	APC, TPMT
											XRCC1	TPMT	0.999	0	53	0	1	1	Mutually_Exclusive	TPMT, XRCC1
											PIK3CA	XRCC1	0.999	0	48	0	1	6	Mutually_Exclusive	PIK3CA, XRCC1
											APC	XRCC1	0.999	0	50	0	1	4	Mutually_Exclusive	APC, XRCC1
											RB1	TP53	0.999	0.875737	19	4	29	3	Mutually_Exclusive	RB1, TP53
											ATM	TP53	0.999	0.661456	21	1	32	1	Mutually_Exclusive	ATM, TP53
											CDKN2A	TP53	0.999	0.661456	21	1	32	1	Mutually_Exclusive	CDKN2A, TP53
											CTNNB1	TP53	0.999	0.661456	21	1	32	1	Mutually_Exclusive	CTNNB1, TP53
											ERBB4	TP53	0.999	0.661456	21	1	32	1	Mutually_Exclusive	ERBB4, TP53
											PDGFRA	TP53	0.999	0.661456	21	1	32	1	Mutually_Exclusive	PDGFRA, TP53
											ERBB2	TP53	0.999	Inf	22	1	32	0	Co_Occurence	ERBB2, TP53
											FBXW7	TP53	0.999	Inf	22	1	32	0	Co_Occurence	FBXW7, TP53
											JAK2	TP53	0.999	Inf	22	1	32	0	Co_Occurence	JAK2, TP53
											KIT	TP53	0.999	Inf	22	1	32	0	Co_Occurence	KIT, TP53
											NRAS	TP53	0.999	Inf	22	1	32	0	Co_Occurence	NRAS, TP53
											TPMT	TP53	0.999	Inf	22	1	32	0	Co_Occurence	TP53, TPMT
											XRCC1	TP53	0.999	Inf	22	1	32	0	Co_Occurence	TP53, XRCC1
											PIK3CA	EGFR	0.999	0.792793	30	2	19	4	Mutually_Exclusive	EGFR, PIK3CA
											DPYD	EGFR	0.999	0.803178	32	1	20	2	Mutually_Exclusive	DPYD, EGFR
											BRAF	EGFR	0.999	0	33	0	21	1	Mutually_Exclusive	BRAF, EGFR
											ERBB2	EGFR	0.999	0	33	0	21	1	Mutually_Exclusive	EGFR, ERBB2
											FBXW7	EGFR	0.999	0	33	0	21	1	Mutually_Exclusive	EGFR, FBXW7
											IDH1	EGFR	0.999	0	33	0	21	1	Mutually_Exclusive	EGFR, IDH1
											NRAS	EGFR	0.999	0	33	0	21	1	Mutually_Exclusive	EGFR, NRAS
											SRC	EGFR	0.999	0	33	0	21	1	Mutually_Exclusive	EGFR, SRC
											XRCC1	EGFR	0.999	0	33	0	21	1	Mutually_Exclusive	EGFR, XRCC1
											CDKN2A	KRAS	0.999	0	45	0	8	2	Mutually_Exclusive	CDKN2A, KRAS
											CTNNB1	KRAS	0.999	0	45	0	8	2	Mutually_Exclusive	CTNNB1, KRAS
											ERBB4	KRAS	0.999	0	45	0	8	2	Mutually_Exclusive	ERBB4, KRAS
											OBSCN	KRAS	0.999	0	45	0	8	2	Mutually_Exclusive	KRAS, OBSCN
											PDGFRA	KRAS	0.999	0	45	0	8	2	Mutually_Exclusive	KRAS, PDGFRA
											BRAF	KRAS	0.999	0	46	0	8	1	Mutually_Exclusive	BRAF, KRAS
											ERBB2	KRAS	0.999	0	46	0	8	1	Mutually_Exclusive	ERBB2, KRAS
											IDH1	KRAS	0.999	0	46	0	8	1	Mutually_Exclusive	IDH1, KRAS
											JAK2	KRAS	0.999	0	46	0	8	1	Mutually_Exclusive	JAK2, KRAS
											KIT	KRAS	0.999	0	46	0	8	1	Mutually_Exclusive	KIT, KRAS
											MTOR	KRAS	0.999	0	46	0	8	1	Mutually_Exclusive	KRAS, MTOR
											NRAS	KRAS	0.999	0	46	0	8	1	Mutually_Exclusive	KRAS, NRAS
											SRC	KRAS	0.999	0	46	0	8	1	Mutually_Exclusive	KRAS, SRC
											TERT	KRAS	0.999	0	46	0	8	1	Mutually_Exclusive	KRAS, TERT
											TPMT	KRAS	0.999	0	46	0	8	1	Mutually_Exclusive	KRAS, TPMT
											XRCC1	KRAS	0.999	0	46	0	8	1	Mutually_Exclusive	KRAS, XRCC1
											PIK3CA	CD3EAP	0.999	0	42	0	7	6	Mutually_Exclusive	CD3EAP, PIK3CA
											APC	CD3EAP	0.999	0	44	0	7	4	Mutually_Exclusive	APC, CD3EAP
											CYP2D6	CD3EAP	0.999	0	45	0	7	3	Mutually_Exclusive	CD3EAP, CYP2D6
											ERBB2	CD3EAP	0.999	0	47	0	7	1	Mutually_Exclusive	CD3EAP, ERBB2
											FBXW7	CD3EAP	0.999	0	47	0	7	1	Mutually_Exclusive	CD3EAP, FBXW7
											JAK2	CD3EAP	0.999	0	47	0	7	1	Mutually_Exclusive	CD3EAP, JAK2
											KIT	CD3EAP	0.999	0	47	0	7	1	Mutually_Exclusive	CD3EAP, KIT
											MTOR	CD3EAP	0.999	0	47	0	7	1	Mutually_Exclusive	CD3EAP, MTOR
											NRAS	CD3EAP	0.999	0	47	0	7	1	Mutually_Exclusive	CD3EAP, NRAS
											SRC	CD3EAP	0.999	0	47	0	7	1	Mutually_Exclusive	CD3EAP, SRC
											TERT	CD3EAP	0.999	0	47	0	7	1	Mutually_Exclusive	CD3EAP, TERT
											TPMT	CD3EAP	0.999	0	47	0	7	1	Mutually_Exclusive	CD3EAP, TPMT
											XRCC1	CD3EAP	0.999	0	47	0	7	1	Mutually_Exclusive	CD3EAP, XRCC1
											APC	RB1	0.999	0	44	0	7	4	Mutually_Exclusive	APC, RB1
											BRAF	RB1	0.999	0	47	0	7	1	Mutually_Exclusive	BRAF, RB1
											ERBB2	RB1	0.999	0	47	0	7	1	Mutually_Exclusive	ERBB2, RB1
											IDH1	RB1	0.999	0	47	0	7	1	Mutually_Exclusive	IDH1, RB1
											JAK2	RB1	0.999	0	47	0	7	1	Mutually_Exclusive	JAK2, RB1
											MTOR	RB1	0.999	0	47	0	7	1	Mutually_Exclusive	MTOR, RB1
											NRAS	RB1	0.999	0	47	0	7	1	Mutually_Exclusive	NRAS, RB1
											SRC	RB1	0.999	0	47	0	7	1	Mutually_Exclusive	RB1, SRC
											TERT	RB1	0.999	0	47	0	7	1	Mutually_Exclusive	RB1, TERT
											TPMT	RB1	0.999	0	47	0	7	1	Mutually_Exclusive	RB1, TPMT
											XRCC1	RB1	0.999	0	47	0	7	1	Mutually_Exclusive	RB1, XRCC1
											CYP2D6	PIK3CA	0.999	0	46	0	6	3	Mutually_Exclusive	CYP2D6, PIK3CA
											DPYD	PIK3CA	0.999	0	46	0	6	3	Mutually_Exclusive	DPYD, PIK3CA
											HRAS	PIK3CA	0.999	0	46	0	6	3	Mutually_Exclusive	HRAS, PIK3CA
											CYP2D6	APC	0.999	0	48	0	4	3	Mutually_Exclusive	APC, CYP2D6
											DPYD	APC	0.999	0	48	0	4	3	Mutually_Exclusive	APC, DPYD
											HRAS	APC	0.999	0	48	0	4	3	Mutually_Exclusive	APC, HRAS
											ATM	APC	0.999	0	49	0	4	2	Mutually_Exclusive	APC, ATM
											CDKN2A	APC	0.999	0	49	0	4	2	Mutually_Exclusive	APC, CDKN2A
											CTNNB1	APC	0.999	0	49	0	4	2	Mutually_Exclusive	APC, CTNNB1
											ERBB4	APC	0.999	0	49	0	4	2	Mutually_Exclusive	APC, ERBB4
											FGFR3	APC	0.999	0	49	0	4	2	Mutually_Exclusive	APC, FGFR3
											NTRK1	APC	0.999	0	49	0	4	2	Mutually_Exclusive	APC, NTRK1
											OBSCN	APC	0.999	0	49	0	4	2	Mutually_Exclusive	APC, OBSCN
											PDGFRA	APC	0.999	0	49	0	4	2	Mutually_Exclusive	APC, PDGFRA
											DPYD	CYP2D6	0.999	0	49	0	3	3	Mutually_Exclusive	CYP2D6, DPYD
											HRAS	CYP2D6	0.999	0	49	0	3	3	Mutually_Exclusive	CYP2D6, HRAS
											BRAF	CYP2D6	0.999	0	51	0	3	1	Mutually_Exclusive	BRAF, CYP2D6
											ERBB2	CYP2D6	0.999	0	51	0	3	1	Mutually_Exclusive	CYP2D6, ERBB2
											FBXW7	CYP2D6	0.999	0	51	0	3	1	Mutually_Exclusive	CYP2D6, FBXW7
											IDH1	CYP2D6	0.999	0	51	0	3	1	Mutually_Exclusive	CYP2D6, IDH1
											JAK2	CYP2D6	0.999	0	51	0	3	1	Mutually_Exclusive	CYP2D6, JAK2
											KIT	CYP2D6	0.999	0	51	0	3	1	Mutually_Exclusive	CYP2D6, KIT
											MTOR	CYP2D6	0.999	0	51	0	3	1	Mutually_Exclusive	CYP2D6, MTOR
											NRAS	CYP2D6	0.999	0	51	0	3	1	Mutually_Exclusive	CYP2D6, NRAS
											SRC	CYP2D6	0.999	0	51	0	3	1	Mutually_Exclusive	CYP2D6, SRC
											TERT	CYP2D6	0.999	0	51	0	3	1	Mutually_Exclusive	CYP2D6, TERT
											TPMT	CYP2D6	0.999	0	51	0	3	1	Mutually_Exclusive	CYP2D6, TPMT
											XRCC1	CYP2D6	0.999	0	51	0	3	1	Mutually_Exclusive	CYP2D6, XRCC1
											HRAS	DPYD	0.999	0	49	0	3	3	Mutually_Exclusive	DPYD, HRAS
											BRAF	DPYD	0.999	0	51	0	3	1	Mutually_Exclusive	BRAF, DPYD
											ERBB2	DPYD	0.999	0	51	0	3	1	Mutually_Exclusive	DPYD, ERBB2
											FBXW7	DPYD	0.999	0	51	0	3	1	Mutually_Exclusive	DPYD, FBXW7
											IDH1	DPYD	0.999	0	51	0	3	1	Mutually_Exclusive	DPYD, IDH1
											JAK2	DPYD	0.999	0	51	0	3	1	Mutually_Exclusive	DPYD, JAK2
											KIT	DPYD	0.999	0	51	0	3	1	Mutually_Exclusive	DPYD, KIT
											MTOR	DPYD	0.999	0	51	0	3	1	Mutually_Exclusive	DPYD, MTOR
											NRAS	DPYD	0.999	0	51	0	3	1	Mutually_Exclusive	DPYD, NRAS
											SRC	DPYD	0.999	0	51	0	3	1	Mutually_Exclusive	DPYD, SRC
											TERT	DPYD	0.999	0	51	0	3	1	Mutually_Exclusive	DPYD, TERT
											TPMT	DPYD	0.999	0	51	0	3	1	Mutually_Exclusive	DPYD, TPMT
											XRCC1	DPYD	0.999	0	51	0	3	1	Mutually_Exclusive	DPYD, XRCC1
											BRAF	HRAS	0.999	0	51	0	3	1	Mutually_Exclusive	BRAF, HRAS
											ERBB2	HRAS	0.999	0	51	0	3	1	Mutually_Exclusive	ERBB2, HRAS
											FBXW7	HRAS	0.999	0	51	0	3	1	Mutually_Exclusive	FBXW7, HRAS
											IDH1	HRAS	0.999	0	51	0	3	1	Mutually_Exclusive	HRAS, IDH1
											JAK2	HRAS	0.999	0	51	0	3	1	Mutually_Exclusive	HRAS, JAK2
											KIT	HRAS	0.999	0	51	0	3	1	Mutually_Exclusive	HRAS, KIT
											MTOR	HRAS	0.999	0	51	0	3	1	Mutually_Exclusive	HRAS, MTOR
											NRAS	HRAS	0.999	0	51	0	3	1	Mutually_Exclusive	HRAS, NRAS
											SRC	HRAS	0.999	0	51	0	3	1	Mutually_Exclusive	HRAS, SRC
											TERT	HRAS	0.999	0	51	0	3	1	Mutually_Exclusive	HRAS, TERT
											TPMT	HRAS	0.999	0	51	0	3	1	Mutually_Exclusive	HRAS, TPMT
											XRCC1	HRAS	0.999	0	51	0	3	1	Mutually_Exclusive	HRAS, XRCC1
											CDKN2A	ATM	0.999	0	51	0	2	2	Mutually_Exclusive	ATM, CDKN2A
											CTNNB1	ATM	0.999	0	51	0	2	2	Mutually_Exclusive	ATM, CTNNB1
											ERBB4	ATM	0.999	0	51	0	2	2	Mutually_Exclusive	ATM, ERBB4
											FGFR3	ATM	0.999	0	51	0	2	2	Mutually_Exclusive	ATM, FGFR3
											NTRK1	ATM	0.999	0	51	0	2	2	Mutually_Exclusive	ATM, NTRK1
											OBSCN	ATM	0.999	0	51	0	2	2	Mutually_Exclusive	ATM, OBSCN
											PDGFRA	ATM	0.999	0	51	0	2	2	Mutually_Exclusive	ATM, PDGFRA
											BRAF	ATM	0.999	0	52	0	2	1	Mutually_Exclusive	ATM, BRAF
											ERBB2	ATM	0.999	0	52	0	2	1	Mutually_Exclusive	ATM, ERBB2
											FBXW7	ATM	0.999	0	52	0	2	1	Mutually_Exclusive	ATM, FBXW7
											IDH1	ATM	0.999	0	52	0	2	1	Mutually_Exclusive	ATM, IDH1
											JAK2	ATM	0.999	0	52	0	2	1	Mutually_Exclusive	ATM, JAK2
											KIT	ATM	0.999	0	52	0	2	1	Mutually_Exclusive	ATM, KIT
											MTOR	ATM	0.999	0	52	0	2	1	Mutually_Exclusive	ATM, MTOR
											NRAS	ATM	0.999	0	52	0	2	1	Mutually_Exclusive	ATM, NRAS
											SRC	ATM	0.999	0	52	0	2	1	Mutually_Exclusive	ATM, SRC
											TERT	ATM	0.999	0	52	0	2	1	Mutually_Exclusive	ATM, TERT
											TPMT	ATM	0.999	0	52	0	2	1	Mutually_Exclusive	ATM, TPMT
											XRCC1	ATM	0.999	0	52	0	2	1	Mutually_Exclusive	ATM, XRCC1
											CTNNB1	CDKN2A	0.999	0	51	0	2	2	Mutually_Exclusive	CDKN2A, CTNNB1
											ERBB4	CDKN2A	0.999	0	51	0	2	2	Mutually_Exclusive	CDKN2A, ERBB4
											NTRK1	CDKN2A	0.999	0	51	0	2	2	Mutually_Exclusive	CDKN2A, NTRK1
											OBSCN	CDKN2A	0.999	0	51	0	2	2	Mutually_Exclusive	CDKN2A, OBSCN
											PDGFRA	CDKN2A	0.999	0	51	0	2	2	Mutually_Exclusive	CDKN2A, PDGFRA
											ERBB2	CDKN2A	0.999	0	52	0	2	1	Mutually_Exclusive	CDKN2A, ERBB2
											FBXW7	CDKN2A	0.999	0	52	0	2	1	Mutually_Exclusive	CDKN2A, FBXW7
											JAK2	CDKN2A	0.999	0	52	0	2	1	Mutually_Exclusive	CDKN2A, JAK2
											MTOR	CDKN2A	0.999	0	52	0	2	1	Mutually_Exclusive	CDKN2A, MTOR
											NRAS	CDKN2A	0.999	0	52	0	2	1	Mutually_Exclusive	CDKN2A, NRAS
											SRC	CDKN2A	0.999	0	52	0	2	1	Mutually_Exclusive	CDKN2A, SRC
											TERT	CDKN2A	0.999	0	52	0	2	1	Mutually_Exclusive	CDKN2A, TERT
											TPMT	CDKN2A	0.999	0	52	0	2	1	Mutually_Exclusive	CDKN2A, TPMT
											XRCC1	CDKN2A	0.999	0	52	0	2	1	Mutually_Exclusive	CDKN2A, XRCC1
											ERBB4	CTNNB1	0.999	0	51	0	2	2	Mutually_Exclusive	CTNNB1, ERBB4
											FGFR3	CTNNB1	0.999	0	51	0	2	2	Mutually_Exclusive	CTNNB1, FGFR3
											NTRK1	CTNNB1	0.999	0	51	0	2	2	Mutually_Exclusive	CTNNB1, NTRK1
											OBSCN	CTNNB1	0.999	0	51	0	2	2	Mutually_Exclusive	CTNNB1, OBSCN
											PDGFRA	CTNNB1	0.999	0	51	0	2	2	Mutually_Exclusive	CTNNB1, PDGFRA
											BRAF	CTNNB1	0.999	0	52	0	2	1	Mutually_Exclusive	BRAF, CTNNB1
											ERBB2	CTNNB1	0.999	0	52	0	2	1	Mutually_Exclusive	CTNNB1, ERBB2
											FBXW7	CTNNB1	0.999	0	52	0	2	1	Mutually_Exclusive	CTNNB1, FBXW7
											IDH1	CTNNB1	0.999	0	52	0	2	1	Mutually_Exclusive	CTNNB1, IDH1
											JAK2	CTNNB1	0.999	0	52	0	2	1	Mutually_Exclusive	CTNNB1, JAK2
											KIT	CTNNB1	0.999	0	52	0	2	1	Mutually_Exclusive	CTNNB1, KIT
											MTOR	CTNNB1	0.999	0	52	0	2	1	Mutually_Exclusive	CTNNB1, MTOR
											NRAS	CTNNB1	0.999	0	52	0	2	1	Mutually_Exclusive	CTNNB1, NRAS
											SRC	CTNNB1	0.999	0	52	0	2	1	Mutually_Exclusive	CTNNB1, SRC
											TERT	CTNNB1	0.999	0	52	0	2	1	Mutually_Exclusive	CTNNB1, TERT
											TPMT	CTNNB1	0.999	0	52	0	2	1	Mutually_Exclusive	CTNNB1, TPMT
											XRCC1	CTNNB1	0.999	0	52	0	2	1	Mutually_Exclusive	CTNNB1, XRCC1
											FGFR3	ERBB4	0.999	0	51	0	2	2	Mutually_Exclusive	ERBB4, FGFR3
											NTRK1	ERBB4	0.999	0	51	0	2	2	Mutually_Exclusive	ERBB4, NTRK1
											OBSCN	ERBB4	0.999	0	51	0	2	2	Mutually_Exclusive	ERBB4, OBSCN
											PDGFRA	ERBB4	0.999	0	51	0	2	2	Mutually_Exclusive	ERBB4, PDGFRA
											BRAF	ERBB4	0.999	0	52	0	2	1	Mutually_Exclusive	BRAF, ERBB4
											ERBB2	ERBB4	0.999	0	52	0	2	1	Mutually_Exclusive	ERBB2, ERBB4
											FBXW7	ERBB4	0.999	0	52	0	2	1	Mutually_Exclusive	ERBB4, FBXW7
											IDH1	ERBB4	0.999	0	52	0	2	1	Mutually_Exclusive	ERBB4, IDH1
											JAK2	ERBB4	0.999	0	52	0	2	1	Mutually_Exclusive	ERBB4, JAK2
											KIT	ERBB4	0.999	0	52	0	2	1	Mutually_Exclusive	ERBB4, KIT
											MTOR	ERBB4	0.999	0	52	0	2	1	Mutually_Exclusive	ERBB4, MTOR
											NRAS	ERBB4	0.999	0	52	0	2	1	Mutually_Exclusive	ERBB4, NRAS
											SRC	ERBB4	0.999	0	52	0	2	1	Mutually_Exclusive	ERBB4, SRC
											TERT	ERBB4	0.999	0	52	0	2	1	Mutually_Exclusive	ERBB4, TERT
											TPMT	ERBB4	0.999	0	52	0	2	1	Mutually_Exclusive	ERBB4, TPMT
											XRCC1	ERBB4	0.999	0	52	0	2	1	Mutually_Exclusive	ERBB4, XRCC1
											OBSCN	FGFR3	0.999	0	51	0	2	2	Mutually_Exclusive	FGFR3, OBSCN
											PDGFRA	FGFR3	0.999	0	51	0	2	2	Mutually_Exclusive	FGFR3, PDGFRA
											ERBB2	FGFR3	0.999	0	52	0	2	1	Mutually_Exclusive	ERBB2, FGFR3
											FBXW7	FGFR3	0.999	0	52	0	2	1	Mutually_Exclusive	FBXW7, FGFR3
											JAK2	FGFR3	0.999	0	52	0	2	1	Mutually_Exclusive	FGFR3, JAK2
											KIT	FGFR3	0.999	0	52	0	2	1	Mutually_Exclusive	FGFR3, KIT
											MTOR	FGFR3	0.999	0	52	0	2	1	Mutually_Exclusive	FGFR3, MTOR
											NRAS	FGFR3	0.999	0	52	0	2	1	Mutually_Exclusive	FGFR3, NRAS
											SRC	FGFR3	0.999	0	52	0	2	1	Mutually_Exclusive	FGFR3, SRC
											TERT	FGFR3	0.999	0	52	0	2	1	Mutually_Exclusive	FGFR3, TERT
											TPMT	FGFR3	0.999	0	52	0	2	1	Mutually_Exclusive	FGFR3, TPMT
											XRCC1	FGFR3	0.999	0	52	0	2	1	Mutually_Exclusive	FGFR3, XRCC1
											OBSCN	NTRK1	0.999	0	51	0	2	2	Mutually_Exclusive	NTRK1, OBSCN
											PDGFRA	NTRK1	0.999	0	51	0	2	2	Mutually_Exclusive	NTRK1, PDGFRA
											BRAF	NTRK1	0.999	0	52	0	2	1	Mutually_Exclusive	BRAF, NTRK1
											ERBB2	NTRK1	0.999	0	52	0	2	1	Mutually_Exclusive	ERBB2, NTRK1
											FBXW7	NTRK1	0.999	0	52	0	2	1	Mutually_Exclusive	FBXW7, NTRK1
											IDH1	NTRK1	0.999	0	52	0	2	1	Mutually_Exclusive	IDH1, NTRK1
											JAK2	NTRK1	0.999	0	52	0	2	1	Mutually_Exclusive	JAK2, NTRK1
											KIT	NTRK1	0.999	0	52	0	2	1	Mutually_Exclusive	KIT, NTRK1
											MTOR	NTRK1	0.999	0	52	0	2	1	Mutually_Exclusive	MTOR, NTRK1
											NRAS	NTRK1	0.999	0	52	0	2	1	Mutually_Exclusive	NRAS, NTRK1
											SRC	NTRK1	0.999	0	52	0	2	1	Mutually_Exclusive	NTRK1, SRC
											TERT	NTRK1	0.999	0	52	0	2	1	Mutually_Exclusive	NTRK1, TERT
											TPMT	NTRK1	0.999	0	52	0	2	1	Mutually_Exclusive	NTRK1, TPMT
											XRCC1	NTRK1	0.999	0	52	0	2	1	Mutually_Exclusive	NTRK1, XRCC1
											PDGFRA	OBSCN	0.999	0	51	0	2	2	Mutually_Exclusive	OBSCN, PDGFRA
											BRAF	OBSCN	0.999	0	52	0	2	1	Mutually_Exclusive	BRAF, OBSCN
											ERBB2	OBSCN	0.999	0	52	0	2	1	Mutually_Exclusive	ERBB2, OBSCN
											FBXW7	OBSCN	0.999	0	52	0	2	1	Mutually_Exclusive	FBXW7, OBSCN
											IDH1	OBSCN	0.999	0	52	0	2	1	Mutually_Exclusive	IDH1, OBSCN
											JAK2	OBSCN	0.999	0	52	0	2	1	Mutually_Exclusive	JAK2, OBSCN
											KIT	OBSCN	0.999	0	52	0	2	1	Mutually_Exclusive	KIT, OBSCN
											MTOR	OBSCN	0.999	0	52	0	2	1	Mutually_Exclusive	MTOR, OBSCN
											NRAS	OBSCN	0.999	0	52	0	2	1	Mutually_Exclusive	NRAS, OBSCN
											SRC	OBSCN	0.999	0	52	0	2	1	Mutually_Exclusive	OBSCN, SRC
											TERT	OBSCN	0.999	0	52	0	2	1	Mutually_Exclusive	OBSCN, TERT
											TPMT	OBSCN	0.999	0	52	0	2	1	Mutually_Exclusive	OBSCN, TPMT
											XRCC1	OBSCN	0.999	0	52	0	2	1	Mutually_Exclusive	OBSCN, XRCC1
											BRAF	PDGFRA	0.999	0	52	0	2	1	Mutually_Exclusive	BRAF, PDGFRA
											ERBB2	PDGFRA	0.999	0	52	0	2	1	Mutually_Exclusive	ERBB2, PDGFRA
											FBXW7	PDGFRA	0.999	0	52	0	2	1	Mutually_Exclusive	FBXW7, PDGFRA
											IDH1	PDGFRA	0.999	0	52	0	2	1	Mutually_Exclusive	IDH1, PDGFRA
											KIT	PDGFRA	0.999	0	52	0	2	1	Mutually_Exclusive	KIT, PDGFRA
											MTOR	PDGFRA	0.999	0	52	0	2	1	Mutually_Exclusive	MTOR, PDGFRA
											NRAS	PDGFRA	0.999	0	52	0	2	1	Mutually_Exclusive	NRAS, PDGFRA
											SRC	PDGFRA	0.999	0	52	0	2	1	Mutually_Exclusive	PDGFRA, SRC
											TERT	PDGFRA	0.999	0	52	0	2	1	Mutually_Exclusive	PDGFRA, TERT
											TPMT	PDGFRA	0.999	0	52	0	2	1	Mutually_Exclusive	PDGFRA, TPMT
											XRCC1	PDGFRA	0.999	0	52	0	2	1	Mutually_Exclusive	PDGFRA, XRCC1
